# Supplementary material
Source: publisher figshare collection journal article supplement (https://acs.figshare.com/ndownloader/files/4256290)
Supplement: Supplementary file 1 [file 4256290]

## SUPPORTING INFORMATION

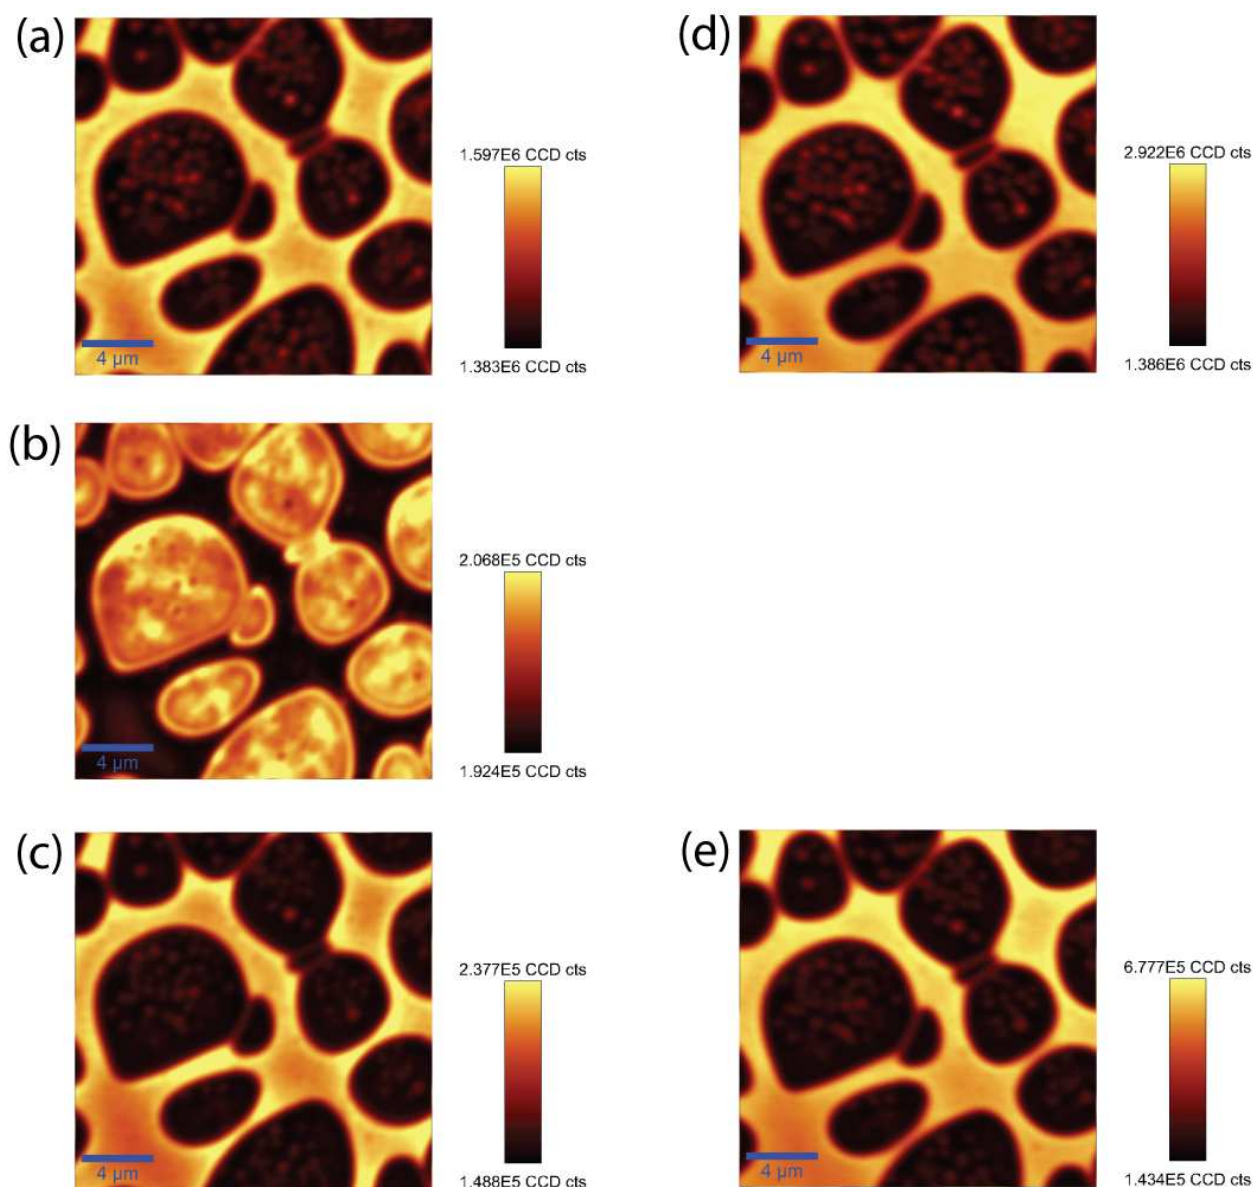

Fig. S1: Two-dimensional photoluminescence spectra of the PFB:F8BT blend – Total PL (410–690 nm) at  $\lambda_{\text{ex}}$ =375 nm (a), PFB PL (435–475 nm) at  $\lambda_{\text{ex}}$ =375 nm (b), F8BT PL (535–565 nm) at  $\lambda_{\text{ex}}$ =375 nm (c), Total PL (470–690 nm) at  $\lambda_{\text{ex}}$ =445 nm (d), F8BT PL (535–565 nm) at  $\lambda_{\text{ex}}$ =445 nm (e); PFB PL was not measured for  $\lambda_{\text{ex}}$ =445 nm because of the strong spectral overlap with the excitation beam.

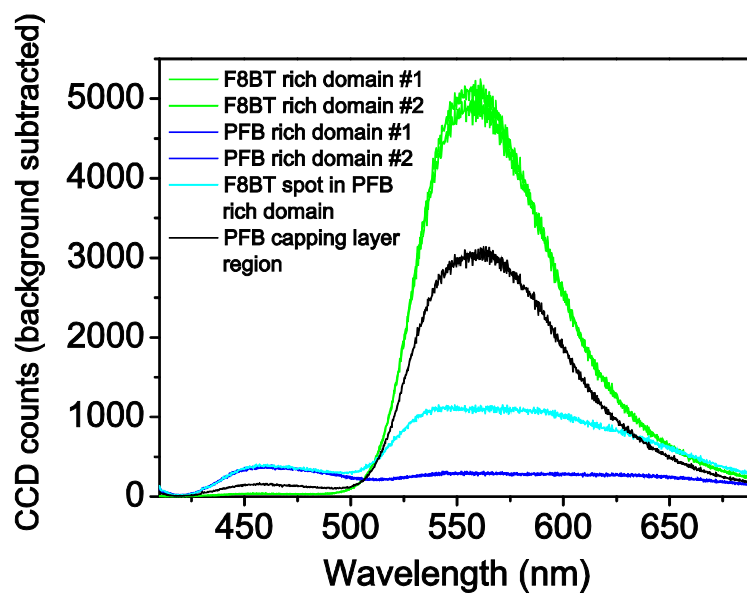

Fig.S2: Unnormalized spectra at different regions ( $\lambda_{\text{ex}}=445$  nm) as shown in Figure 7b; background (laser off) has been subtracted.
